# Supplementary material
Source: PubMed Central journal article supplement (PMC10349351)
Supplement: jama-e2312945-s002.pdf [file jama-e2312945-s002.pdf]

## Data Sharing Statement

McGarry. Monoclonal Antibody and Oral Antiviral Treatment of SARS-CoV-2 Infection in US Nursing Homes. *JAMA*. Published July 14, 2023. doi:10.1001/jama.2023.12945

### Data

**Data available:** Yes

**Data types:** Data (not involving human participants)

**How to access data:** Data are publicly available here: <https://data.cms.gov/covid-19/covid-19-nursing-home-data> Replication code will be provided upon request from:

[Brian\\_mcgarry@urmc.rochester.edu](mailto:Brian_mcgarry@urmc.rochester.edu)

**When available:** With publication

### Supporting Documents

**Document types:** None

### Additional Information

**Who can access the data:** anyone requesting the data

**Types of analyses:** for any purpose

**Mechanisms of data availability:** without investigator support
